# Supplementary material
Source: Springer Nature journal article supplement (https://www.springermedizin.de/resource/supplementary/12879_2013_3089_MOESM4_ESM.pdf/9445988)

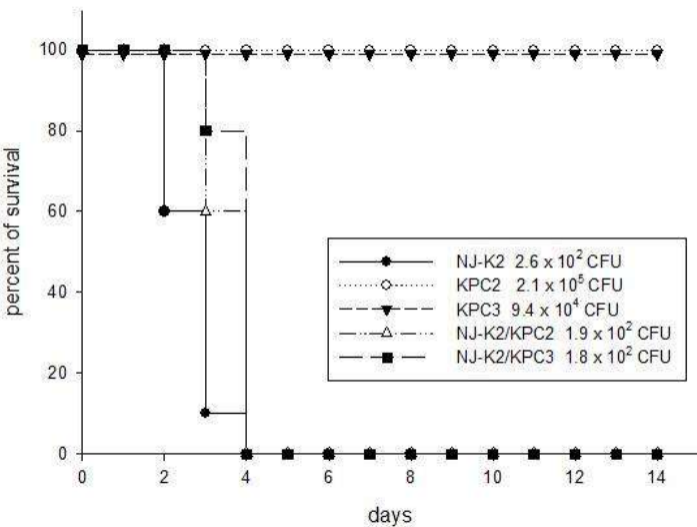

Supplement: MOESM4 [file 9445988]
